# Supplementary material
Source: publisher site journal article supplement (https://www.spandidos-publications.com/7895/downloadSupplementary)
Supplement: Supplementary file 1 [file downloadSupplementary]

**Table S1.** Nucleotide sequences of siRNA and plasmid.

| siRNA/plasmid name  | Application | Oligonucleotide sequence                                                                                                                                                                                                                                                                                                                                                                                                                                                                                                                                                                                                                                                                                                                                                                                                                                                                                                                                                                                                                                                                                                                                                                                                                                                                                                                                                                                                                                                                                                                                                                                                                                                                                                                                                                                                                                                                                                                                                                                                                                                                                                                                                                                                                 | Source |
|---------------------|-------------|------------------------------------------------------------------------------------------------------------------------------------------------------------------------------------------------------------------------------------------------------------------------------------------------------------------------------------------------------------------------------------------------------------------------------------------------------------------------------------------------------------------------------------------------------------------------------------------------------------------------------------------------------------------------------------------------------------------------------------------------------------------------------------------------------------------------------------------------------------------------------------------------------------------------------------------------------------------------------------------------------------------------------------------------------------------------------------------------------------------------------------------------------------------------------------------------------------------------------------------------------------------------------------------------------------------------------------------------------------------------------------------------------------------------------------------------------------------------------------------------------------------------------------------------------------------------------------------------------------------------------------------------------------------------------------------------------------------------------------------------------------------------------------------------------------------------------------------------------------------------------------------------------------------------------------------------------------------------------------------------------------------------------------------------------------------------------------------------------------------------------------------------------------------------------------------------------------------------------------------|--------|
| PHLDB2-siRNA        | siRNA1      | Sense: 5' -GAUCUACCUCAUAGCGUAAUATT-3'                                                                                                                                                                                                                                                                                                                                                                                                                                                                                                                                                                                                                                                                                                                                                                                                                                                                                                                                                                                                                                                                                                                                                                                                                                                                                                                                                                                                                                                                                                                                                                                                                                                                                                                                                                                                                                                                                                                                                                                                                                                                                                                                                                                                    | Kidán  |
|                     |             | Antisense: 5' -UAUUACGCUAUGAGGUAGAUCTT-3'                                                                                                                                                                                                                                                                                                                                                                                                                                                                                                                                                                                                                                                                                                                                                                                                                                                                                                                                                                                                                                                                                                                                                                                                                                                                                                                                                                                                                                                                                                                                                                                                                                                                                                                                                                                                                                                                                                                                                                                                                                                                                                                                                                                                |        |
| PHLDB2-siRNA        | siRNA2      | Sense: 5' -GAGGAUGCUCAGAGGUUAUAATT-3'                                                                                                                                                                                                                                                                                                                                                                                                                                                                                                                                                                                                                                                                                                                                                                                                                                                                                                                                                                                                                                                                                                                                                                                                                                                                                                                                                                                                                                                                                                                                                                                                                                                                                                                                                                                                                                                                                                                                                                                                                                                                                                                                                                                                    | Kidán  |
|                     |             | Antisense: 5' -UUAUAACCUCUGAGCAUCCUCTT-3'                                                                                                                                                                                                                                                                                                                                                                                                                                                                                                                                                                                                                                                                                                                                                                                                                                                                                                                                                                                                                                                                                                                                                                                                                                                                                                                                                                                                                                                                                                                                                                                                                                                                                                                                                                                                                                                                                                                                                                                                                                                                                                                                                                                                |        |
| Control-siRNA       | siRNA       | Sense: 5'-GCAUCGAGUCUAGCGUAAAUU-3'                                                                                                                                                                                                                                                                                                                                                                                                                                                                                                                                                                                                                                                                                                                                                                                                                                                                                                                                                                                                                                                                                                                                                                                                                                                                                                                                                                                                                                                                                                                                                                                                                                                                                                                                                                                                                                                                                                                                                                                                                                                                                                                                                                                                       | Kidán  |
|                     |             | Antisense: 3'-UCGUAGCUCAGAUCGCAUUUA-5'                                                                                                                                                                                                                                                                                                                                                                                                                                                                                                                                                                                                                                                                                                                                                                                                                                                                                                                                                                                                                                                                                                                                                                                                                                                                                                                                                                                                                                                                                                                                                                                                                                                                                                                                                                                                                                                                                                                                                                                                                                                                                                                                                                                                   |        |
| PHLDB2-EGFP plasmid | Plasmid     | 5'-<br>TCTAGAGCCACCATGGAAGAGCATAGCTACATACAAAAGGAGCT<br>AGATTTACAAAATGGTAGCTTAGAGGAAGACTCTGTGGTGCATTC<br>TGTTGAGAACGATTCCCAAACATGATGGAGAGCCTCAGCCCAA<br>AGAAATACTCTTCCAGTCTGAGATTTAAAGCCAATGGAGACTATT<br>CTGGCTCCTATTTAACCCTCTACAACCTGTGCCGTCAAAGAGAA<br>GCCCTTCTCCTTTGGGAACCAGTGTGAGAAGCAGCCCTCCTTAG<br>CCAAAATCCAGGGAAGCAAGCAGTTCTCTTATGATGGAACGTGAC<br>AAAAATATTCTATGAAACCTCCAACCTTTACTCAACTACTACA<br>TCCTCCCTCAGTGGATATCCACTTGGAAGAGCAGACTTTGATCAT<br>TATACTGGCCGGACAGTGAAAGGGCCTTGAGGCTCTCAGAGAA<br>GCCTCCCTATTCCAAATATAGCTCAAGGCATAAATCGCATGACAA<br>TGTCTACTCTCTTGAGGGCTGGAAGGTCGGAAGGCATCTGGCTC<br>GCTCTGGCCATGTGGAATGGAAGTCCCTGAGTGATGCTGGCCC<br>GCCTCCTATCAGCAGATCGGGAGCCGCAAGCATGCCTTCAAGCCC<br>AAAGCAAGCCAGGAAAATGAGCATTAGGACAGCCTGGCGCTTC<br>AACCCAAAGTTAACTAGACACAAGGAGCTTGCATCTGAAAACATC<br>AATTTGAGAAGTAGGAAGTACTCCAGCAGCAGCCTGAGTCACAT<br>GGGAGCCTACAGCCGATCACTTCCAGGTTGTACAGAGCCACAG<br>AGAACCAGCTGACACCTCTCAGCTTGCCTCCAAGAACTCTCTGG<br>GCAATTCCAAACGAACAAAACCTTGGGGAAAAGGATCTACCTCAT<br>AGCGTAATAGACAATGACAATTACCTTAATTTTTCTTCTTTGAGCT<br>CAGGGGCTTTACCTATAAAAACCTCTGCTTCTGAAGGCAATCCTT<br>ATGTAAGTTCTACCCTCAGTGCCCTGCCAGTCCACGAGTGGCTC<br>GGAAGATGCTTCTGGCCTCCACCTCCTCTGTGCCTCTGATGACTT<br>TGATCAGGCTTCATATGTGGGGACAAACCCGAGTCACTTCTCT<br>TGCTGGAGAGTCAGACAGAGTTTTTTCGACCAGGAGGAACCTTCTC<br>TTGTGGATCTGTGGAATTTGATGAGGCAGATTTGGAAAGCCTCAG<br>ACAGGGCGGAGGAGGATCTGGAGGAGGAGGTTCTGGAGGAGGA<br>GGATCTATGGTGAGCAAGGGCGAGGAGCTGTTACCGGGGTGGT<br>GCCCATCCTGGTCGAGCTGGACGGCGACGTAACGGCCACAAGT<br>TCAGCGTGTCCGGCGAGGGCGAGGGCGATGCCACCTACGGCAAG<br>CTGACCCTGAAGTTCATCTGCACCACCGGCAAGCTGCCCGTGCCC<br>TGGCCACCCCTCGTGACCACCCTGACCTACGGCGTGCAGTGCTTC<br>AGCCGCTACCCCGACCACATGAAGCAGCAGACTTCTTCAAGTCC<br>GCCATGCCCGAAGGCTACGTCCAGGAGCGCACCATCTTCTTCAAG<br>GACGACGGCAACTACAAGACCCGCGCCGAGGTGAAGTTCGAGGG<br>CGACACCCTGGTGAACCGCATCGAGCTGAAGGGCATCGACTTCA<br>AGGAGGACGGCAACATCCTGGGGCACAAGCTGGAGTACAAC'TAC<br>AACAGCCACAACGTCTATATCATGGCCGACAAGCAGAAGAACGG<br>CATCAAGGTGAAC'TTCAAGATCCGCCACAACATCGAGGACGGCA<br>GCGTGCAGCTCGCCGACCACTACCAGCAGAACACCCCATCGGC<br>GACGGCCCCGTGCTGCTGCCGACAACCACTACCTGAGCACCCAG<br>TCCGCCCTGAGCAAAGACCCCAACGAGAAGCGCGATCACATGGT<br>CCTGCTGGAGTTCGTGACC GCCGGGATCACTCTCGGCATGGA<br>CGAGCTGTACAAGTAAGGATCC-3' | Kidán  |

siRNA, small interfering RNA.

**Table SII.** Nucleotide sequence of the primer.

| <b>Primer name</b> | <b>Application</b> | <b>Oligonucleotide sequence</b>       | <b>Source</b>             |
|--------------------|--------------------|---------------------------------------|---------------------------|
| PHLDB2             | qPCR               | Forward: 5'-CTCGTCCTTTGACACGCT-3'     | Generay Biotech Co., Ltd. |
|                    |                    | Reverse:5'-ATCCTCGGCAGGTCTTCT-3'      |                           |
| SYT1               | qPCR               | Forward: 5'-GAAAGTGCAGGTGGTGGT-3'     | Generay Biotech Co., Ltd. |
|                    |                    | Reverse:5'-ATAGGTCGCCTGGGGTT-3'       |                           |
| MYO1B              | qPCR               | Forward: 5'-GAGAGGGATTTTCAGCAGGT-3'   | Generay Biotech Co., Ltd. |
|                    |                    | Reverse:5'-CCGCCAAGACAGACTCA-3'       |                           |
| CORO2B             | qPCR               | Forward: 5'-AGCTGCGTGTGATTGAGC-3'     | Generay Biotech Co., Ltd. |
|                    |                    | Reverse:5'-TGGAGACCCCTGTCGTG-3'       |                           |
| CDH13              | qPCR               | Forward: 5'-GCCTCTGGAAGTCATTGTG-3'    | Generay Biotech Co., Ltd. |
|                    |                    | Reverse:5'-ATTATCGGTGGCTGGGT-3'       |                           |
| DDX21              | qPCR               | Forward: 5'-AGATGCTCCTAAGCCCAAG-3'    | Generay Biotech Co., Ltd. |
|                    |                    | Reverse:5'-GGGTTACAGTCCGGTTCA-3'      |                           |
| PKLR               | qPCR               | Forward: 5'-GTCCACTTATGCCGAGGAG-3'    | Generay Biotech Co., Ltd. |
|                    |                    | Reverse:5'-ACGGAGCTTTCCACTTTCA-3'     |                           |
| GADPH              | qPCR               | Forward: 5'-GGAGCGAGATCCCTCCAAAAT-3'  | Generay Biotech Co., Ltd. |
|                    |                    | Reverse:5'-GGCTGTTGTCATACTTCTCATGG-3' |                           |

qPCR, quantitative PCR.
